# Supplementary material for: Patient-level and practice-level factors associated with consultation duration: a cross-sectional analysis of over one million consultations in English primary care
Source: PubMed Central journal article supplement (PMC5701995; doi:10.1136/bmjopen-2017-018261), 2017-11-16
Supplement: bmjopen-2017-018261supp001.pdf [file bmjopen-2017-018261supp001.pdf]

## Supplement

Figure S1: Distribution of mean consultation duration in each practice for face-to-face or telephone consultations conducted by a GP or nurse

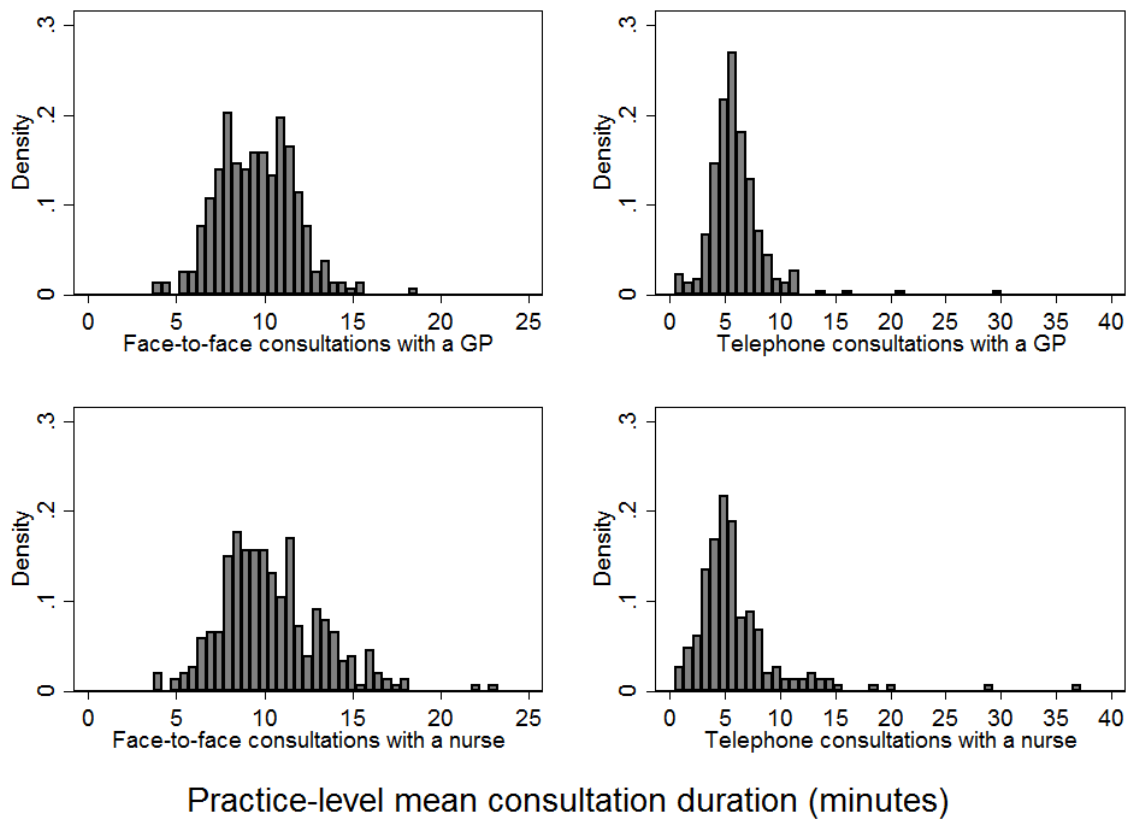

Table S1: Characteristics of practices according to mean duration of consultation with a GP

|                                                             | Practice mean consultation duration (minutes) (N=316) |                     |                    |                    |                    |                |
|-------------------------------------------------------------|-------------------------------------------------------|---------------------|--------------------|--------------------|--------------------|----------------|
|                                                             | <5                                                    | ≥5 and <8           | ≥8 and <10         | ≥10 and <12        | ≥12 and <15        | ≥15            |
| <b>Number of practices (%)</b>                              | <b>4 (1.3)</b>                                        | <b>96 (30.4)</b>    | <b>118 (37.3)</b>  | <b>83 (26.3)</b>   | <b>14 (4.4)</b>    | <b>1 (0.3)</b> |
| Mean list size (SD)                                         | 5,580.0 (713.0)                                       | 10,149.3 (4,603.6)  | 10,232.1 (4809.5)  | 8,771.6 (4,590.9)  | 7,715.2 (2,912.3)  | 9,220.0 (-)    |
| Training practice                                           |                                                       |                     |                    |                    |                    |                |
| Yes: N (%)                                                  | 0 (0.0)                                               | 33 (34.4)           | 53 (44.9)          | 35 (42.2)          | 5 (35.7)           | 0 (0.0)        |
| Rurality                                                    |                                                       |                     |                    |                    |                    |                |
| Not rural (Urban >10K - less sparse):N (%)                  | 4 (100.0)                                             | 82 (85.4)           | 101 (85.6)         | 68 (81.9)          | 12 (85.7)          | 0 (0.0)        |
| Mean GP consultation rate (per 10,000 person years) (SD)    | 46,877.5 (17,478.6)                                   | 42,488.2 (16,711.8) | 37,671.8 (9,954.9) | 32,618.1 (9,227.8) | 28,463.9 (9,387.5) | 13,895.5 (-)   |
| Mean nurse consultation rate (per 10,000 person years) (SD) | 12,777.7 (4,657.8)                                    | 14,270.9 (7,893.9)  | 13,566.1 (7,677.1) | 11,707.4 (6,888.7) | 12,279.2 (8,778.4) | 11,124.7 (-)   |
| Number of FTE GPs                                           |                                                       |                     |                    |                    |                    |                |
| ≤2: N (%)                                                   | 2 (50.0)                                              | 9 (9.4)             | 16 (13.6)          | 14 (16.9)          | 3 (21.4)           | 0 (0.0)        |
| >2 and ≤4: N (%)                                            | 2 (50.0)                                              | 24 (25.0)           | 22 (18.6)          | 24 (28.9)          | 2 (14.3)           | 0 (0.0)        |
| >4 and ≤6: N (%)                                            | 0 (0.0)                                               | 37 (38.5)           | 32 (27.1)          | 24 (28.9)          | 7 (50.0)           | 1 (100.0)      |
| >6 and ≤8: N (%)                                            | 0 (0.0)                                               | 15 (15.6)           | 25 (21.2)          | 15 (18.1)          | 0 (0.0)            | 0 (0.0)        |
| >8 and ≤19: N (%)                                           | 0 (0.0)                                               | 11 (11.5)           | 22 (18.6)          | 5 (6.0)            | 2(14.3)            | 0 (0.0)        |
| Number of FTE nurses                                        |                                                       |                     |                    |                    |                    |                |
| ≤2: N (%)                                                   | 4 (100.0)                                             | 51 (53.1)           | 69 (58.5)          | 52 (62.7)          | 12 (85.7)          | 0 (0.0)        |
| >2 and ≤4: N (%)                                            | 0 (0.0)                                               | 22 (22.9)           | 22 (18.6)          | 18 (21.7)          | 2 (14.3)           | 1 (100.0)      |
| >4 and ≤6: N (%)                                            | 0 (0.0)                                               | 8 (8.3)             | 10 (8.5)           | 2 (2.4)            | 0 (0.0)            | 0 (0.0)        |
| >6 and ≤8: N (%)                                            | 0 (0.0)                                               | 4 (4.2)             | 2 (1.7)            | 0 (0.0)            | 0 (0.0)            | 0 (0.0)        |
| >8 and ≤19: N (%)                                           | 0 (0.0)                                               | 2 (2.1)             | 2 (1.7)            | 0 (0.0)            | 0 (0.0)            | 0 (0.0)        |
| QOF performance                                             |                                                       |                     |                    |                    |                    |                |
| 1 <sup>st</sup> quintile (poorest performance): N (%)       | 2 (50.0)                                              | 15 (15.6)           | 18 (15.3)          | 12 (14.5)          | 3 (21.4)           | 0 (0.0)        |
| 2 <sup>nd</sup> quintile: N (%)                             | 0 (0.0)                                               | 22(22.9)            | 13 (11.0)          | 13 (15.7)          | 1 (7.1)            | 0 (0.0)        |
| 3 <sup>rd</sup> quintile: N (%)                             | 1 (25.0)                                              | 23 (24.0)           | 24 (20.3)          | 8 (9.6)            | 2 (14.3)           | 1 (100.0)      |
| 4 <sup>th</sup> quintile: N (%)                             | 1 (25.0)                                              | 18 (18.8)           | 31 (26.3)          | 27 (32.5)          | 5 (35.7)           | 0 (0.0)        |
| 5 <sup>th</sup> quintile (best performance): N (%)          | 0 (0.0)                                               | 18 (18.8)           | 30 (25.4)          | 22 (26.5)          | 3 (21.4)           | 0 (0.0)        |

Table S2: Full model for consultations with a GP

|                                                                      | Change in duration (seconds) | p-value | 95% confidence interval |         |
|----------------------------------------------------------------------|------------------------------|---------|-------------------------|---------|
| Female gender (Male = reference)                                     | 8.29                         | 0.000   | 6.03                    | 10.55   |
| Ethnic group (White = reference)                                     |                              |         |                         |         |
| Asian                                                                | 4.11                         | 0.231   | -2.61                   | 10.84   |
| Chinese                                                              | -6.32                        | 0.607   | -30.41                  | 17.76   |
| Black                                                                | -5.63                        | 0.205   | -14.34                  | 3.07    |
| Mixed/ Other                                                         | 4.35                         | 0.283   | -3.59                   | 12.29   |
| Unknown                                                              | -11.00                       | 0.000   | -13.50                  | -8.49   |
| Index of multiple deprivation (1 <sup>st</sup> quintile = reference) |                              |         |                         |         |
| 2 <sup>nd</sup> quintile                                             | 1.14                         | 0.535   | -2.47                   | 4.76    |
| 3 <sup>rd</sup> quintile                                             | -2.39                        | 0.235   | -6.33                   | 1.55    |
| 4 <sup>th</sup> quintile                                             | -3.57                        | 0.095   | -7.77                   | 0.62    |
| 5 <sup>th</sup> quintile (most deprived)                             | -5.04                        | 0.037   | -9.77                   | -0.30   |
| Unknown                                                              | -11.27                       | 0.060   | -23.02                  | 0.48    |
| Smoking status (Non-smoker = reference)                              |                              |         |                         |         |
| Current smoker                                                       | -2.36                        | 0.147   | -5.54                   | 0.83    |
| Ex-smoker                                                            | 0.11                         | 0.944   | -2.91                   | 3.13    |
| Unknown                                                              | 18.66                        | 0.000   | 14.58                   | 22.75   |
| Age group (0-14 years = reference)                                   |                              |         |                         |         |
| 15-24                                                                | 55.71                        | 0.000   | 50.12                   | 61.30   |
| 25-44                                                                | 83.69                        | 0.000   | 78.72                   | 88.65   |
| 45-64                                                                | 89.83                        | 0.000   | 84.77                   | 94.89   |
| 65-74                                                                | 65.84                        | 0.000   | 60.25                   | 71.42   |
| 75+                                                                  | 58.44                        | 0.000   | 52.96                   | 63.93   |
| Telephone consultation (Face-to-face = reference)                    | -308.70                      | 0.000   | -311.64                 | -305.76 |
| Practice list size (centred, per 1000)                               | -5.21                        | 0.026   | -9.81                   | -0.61   |
| Number of FTE GPs ( $\leq 2$ = reference)                            |                              |         |                         |         |
| >2 and $\leq 4$                                                      | 27.74                        | 0.206   | -15.23                  | 70.70   |
| >4 and $\leq 6$                                                      | 56.90                        | 0.016   | 10.62                   | 103.18  |
| >6 and $\leq 8$                                                      | 58.06                        | 0.061   | -2.61                   | 118.73  |
| >8 and $\leq 19$                                                     | 120.02                       | 0.002   | 43.58                   | 196.47  |
| Unknown                                                              | 211.75                       | 0.120   | -54.93                  | 478.44  |
| Number of FTE nurses ( $\leq 2$ = reference)                         |                              |         |                         |         |
| >2 and $\leq 4$                                                      | -10.07                       | 0.568   | -44.59                  | 24.46   |
| >4 and $\leq 6$                                                      | -36.07                       | 0.239   | -96.11                  | 23.97   |
| >6 and $\leq 8$                                                      | -141.57                      | 0.003   | -235.44                 | -47.70  |
| >8 and $\leq 19$                                                     | 54.83                        | 0.354   | -61.14                  | 170.81  |
| Unknown                                                              | -16.52                       | 0.429   | -57.41                  | 24.37   |
| Training practice (No = reference)                                   |                              |         |                         |         |
| Yes                                                                  | 45.61                        | 0.001   | 18.26                   | 72.96   |
| Unknown                                                              | -                            |         |                         |         |
| Nurse consultation rate (centred, per 1000 per 10,000 person years)  | 0.40                         | 0.658   | -1.36                   | 2.15    |
| GP consultation rate (centred, per 1000 per 10,000 person years)     | -3.83                        | 0.000   | -4.80                   | -2.85   |
| QOF performance (1 <sup>st</sup> quintile = reference)               |                              |         |                         |         |
| 2 <sup>nd</sup> quintile                                             | 3.50                         | 0.869   | -38.00                  | 44.99   |
| 3 <sup>rd</sup> quintile                                             | -16.22                       | 0.427   | -56.19                  | 23.76   |
| 4 <sup>th</sup> quintile                                             | 27.47                        | 0.147   | -9.67                   | 64.61   |
| 5 <sup>th</sup> quintile (best performance)                          | 18.21                        | 0.343   | -19.40                  | 55.83   |
| Unknown                                                              | -50.43                       | 0.633   | -257.64                 | 156.78  |
| Rural practice (Urban = reference)                                   | 17.21                        | 0.309   | -15.98                  | 50.39   |
| Mean duration                                                        | 417.27                       | 0.000   | 367.50                  | 467.04  |

Table S3: Final model for consultations with a GP including a term for GP registrar role (post-hoc sensitivity analysis)

|                                                                      | Change in duration (seconds) | p-value | 95% confidence interval |         |
|----------------------------------------------------------------------|------------------------------|---------|-------------------------|---------|
| Female gender (Male = reference)                                     | 7.40                         | 0.000   | 5.16                    | 9.63    |
| Ethnic group (White = reference)                                     |                              |         |                         |         |
| Asian                                                                | 4.54                         | 0.181   | -2.11                   | 11.19   |
| Chinese                                                              | -7.76                        | 0.523   | -31.58                  | 16.07   |
| Black                                                                | -7.18                        | 0.102   | -15.79                  | 1.43    |
| Mixed/ Other                                                         | 3.82                         | 0.340   | -4.03                   | 11.68   |
| Unknown                                                              | -12.32                       | 0.000   | -14.80                  | -9.85   |
| Index of multiple deprivation (1 <sup>st</sup> quintile = reference) |                              |         |                         |         |
| 2 <sup>nd</sup> quintile                                             | 0.52                         | 0.776   | -3.06                   | 4.10    |
| 3 <sup>rd</sup> quintile                                             | -3.37                        | 0.090   | -7.27                   | 0.53    |
| 4 <sup>th</sup> quintile                                             | -4.88                        | 0.021   | -9.03                   | -0.74   |
| 5 <sup>th</sup> quintile (most deprived)                             | -6.62                        | 0.006   | -11.30                  | -1.94   |
| Unknown                                                              | -8.24                        | 0.165   | -19.87                  | 3.39    |
| Smoking status (Non-smoker = reference)                              |                              |         |                         |         |
| Current smoker                                                       | -3.11                        | 0.053   | -6.26                   | 0.04    |
| Ex-smoker                                                            | -0.10                        | 0.945   | -3.09                   | 2.88    |
| Unknown                                                              | 15.56                        | 0.000   | 11.52                   | 19.60   |
| Age group (0-14 years = reference)                                   |                              |         |                         |         |
| 15-24                                                                | 52.35                        | 0.000   | 46.82                   | 57.88   |
| 25-44                                                                | 81.88                        | 0.000   | 76.97                   | 86.79   |
| 45-64                                                                | 92.15                        | 0.000   | 87.14                   | 97.15   |
| 65-74                                                                | 71.73                        | 0.000   | 66.21                   | 77.26   |
| 75+                                                                  | 64.95                        | 0.000   | 59.52                   | 70.38   |
| Telephone consultation (Face-to-face = reference)                    | -295.45                      | 0.000   | -298.37                 | -292.53 |
| Training practice (No = reference)                                   |                              |         |                         |         |
| Yes                                                                  | 21.92                        | 0.073   | -2.07                   | 45.90   |
| Unknown                                                              | 133.11                       | 0.107   | -28.55                  | 294.77  |
| GP registrar conducting appointment (No=reference)                   | 245.04                       | 0.000   | 241.49                  | 248.59  |
| GP consultation rate (centred, per 1000 per 10,000 person years)     | -3.33                        | 0.000   | -4.24                   | -2.41   |
| Mean duration                                                        | 460.60                       | 0.000   | 443.91                  | 477.30  |

Table S4: Characteristics of practices according to mean duration of consultation with a nurse

|                                                             | Practice mean consultation duration (minutes) (N=307) |                        |                        |                        |                       |                        |
|-------------------------------------------------------------|-------------------------------------------------------|------------------------|------------------------|------------------------|-----------------------|------------------------|
|                                                             | <5                                                    | ≥5 and <8              | ≥8 and <10             | ≥10 and <12            | ≥12 and <15           | ≥15                    |
| <b>Number of practices (%)</b>                              | <b>3 (1.0)</b>                                        | <b>59 (19.2)</b>       | <b>103 (33.6)</b>      | <b>71 (23.1)</b>       | <b>54 (17.6)</b>      | <b>17 (5.5)</b>        |
| Mean list size (SD)                                         | 8,189.0 (6,263.3)                                     | 9,936.8 (4,101.1)      | 10,029.6 (4,506.8)     | 10,945.5 (5,387.0)     | 8,591.0 (3,987.7)     | 7,286.6 (3,564.8)      |
| Training practice                                           |                                                       |                        |                        |                        |                       |                        |
| Yes: N (%)                                                  | 2 (66.7)                                              | 24 (40.7)              | 43 (41.8)              | 37 (52.1)              | 15 (27.8)             | 5 (29.4)               |
| Rurality                                                    |                                                       |                        |                        |                        |                       |                        |
| Not rural (Urban >10K - less sparse):N (%)                  | 3 (100.0)                                             | 50 (84.8)              | 86 (83.5)              | 59 (83.1)              | 47 (87.0)             | 15 (88.2)              |
| Mean GP consultation rate (per 10,000 person years) (SD)    | 34,558.4<br>(7,497.0)                                 | 39,556.1<br>(17,065.8) | 39,333.7<br>(13,086.5) | 37,073.1<br>(11,166.8) | 34,315.5<br>(8,097.0) | 35,907.5<br>(13,077.5) |
| Mean nurse consultation rate (per 10,000 person years) (SD) | 15,359.3<br>(18,373.0)                                | 17,422.4<br>(7,482.5)  | 15,404.9<br>(7,757.8)  | 12,162.1<br>(5,803.8)  | 9,868.6<br>(4,282.7)  | 7,029.6<br>(3,980.1)   |
| Number of FTE GPs                                           |                                                       |                        |                        |                        |                       |                        |
| ≤2: N (%)                                                   | 1 (33.3)                                              | 5 (8.5)                | 10 (9.7)               | 6 (8.5)                | 12 (22.2)             | 5 (29.4)               |
| >2 and ≤4: N (%)                                            | 1 (33.3)                                              | 14 (23.7)              | 28 (27.2)              | 10 (14.1)              | 16 (29.6)             | 4 (23.5)               |
| >4 and ≤6: N (%)                                            | 0 (0.0)                                               | 22 (37.3)              | 27 (26.2)              | 31 (43.4)              | 13 (24.1)             | 6 (35.3)               |
| >6 and ≤8: N (%)                                            | 1 (33.3)                                              | 10 (17.0)              | 22 (21.4)              | 11 (15.5)              | 9 (16.7)              | 2 (11.8)               |
| >8 and ≤19: N (%)                                           | 0 (0.0)                                               | 7 (11.9)               | 16 (15.5)              | 13 (18.3)              | 4 (7.4)               | 0 (0.0)                |
| Number of FTE nurses                                        |                                                       |                        |                        |                        |                       |                        |
| ≤2: N (%)                                                   | 2 (66.7)                                              | 35 (59.3)              | 51 (49.5)              | 42 (59.2)              | 38 (70.4)             | 12 (70.6)              |
| >2 and ≤4: N (%)                                            | 1 (33.3)                                              | 12 (20.3)              | 28 (27.2)              | 15 (21.2)              | 7 (13.0)              | 2 (11.8)               |
| >4 and ≤6: N (%)                                            | 0 (0.0)                                               | 3 (5.1)                | 11 (10.7)              | 5 (7.0)                | 1 (19.9)              | 0 (0.0)                |
| >6 and ≤8: N (%)                                            | 0 (0.0)                                               | 1 (1.7)                | 0 (0.0)                | 4 (5.6)                | 1 (1.9)               | 0 (0.0)                |
| >8 and ≤19: N (%)                                           | 0 (0.0)                                               | 1 (1.7)                | 2 (1.9)                | 1 (1.4)                | 0 (0.0)               | 0 (0.0)                |
| QOF performance                                             |                                                       |                        |                        |                        |                       |                        |
| 1 <sup>st</sup> quintile (poorest performance): N (%)       | 1 (33.3)                                              | 9 (15.3)               | 15 (14.6)              | 13 (18.3)              | 7 (13.0)              | 2 (11.8)               |
| 2 <sup>nd</sup> quintile: N (%)                             | 0 (0.0)                                               | 5 (8.5)                | 17 (16.5)              | 13 (18.3)              | 10 (18.5)             | 1 (5.9)                |
| 3 <sup>rd</sup> quintile: N (%)                             | 0 (0.0)                                               | 9 (15.3)               | 24 (23.3)              | 13 (18.3)              | 7 (13.0)              | 6 (35.3)               |
| 4 <sup>th</sup> quintile: N (%)                             | 1 (33.3)                                              | 17 (28.8)              | 28 (27.2)              | 20 (28.2)              | 11 (20.4)             | 4 (23.5)               |
| 5 <sup>th</sup> quintile (best performance): N (%)          | 1 (33.3)                                              | 17 (28.8)              | 19 (18.5)              | 12 (16.9)              | 19 (35.2)             | 4 (23.5)               |

Table S5: Full model for consultations with a nurse

|                                                                      | Change in duration (seconds) | p-value | 95% confidence interval |         |
|----------------------------------------------------------------------|------------------------------|---------|-------------------------|---------|
| Female gender (Male = reference)                                     | -11.15                       | 0.000   | -15.34                  | -6.96   |
| Ethnic group (White = reference)                                     |                              |         |                         |         |
| Asian                                                                | 0.18                         | 0.979   | -12.99                  | 13.35   |
| Chinese                                                              | -17.82                       | 0.445   | -63.57                  | 27.93   |
| Black                                                                | -1.67                        | 0.849   | -18.84                  | 15.50   |
| Mixed/ Other                                                         | -5.52                        | 0.489   | -21.18                  | 10.13   |
| Unknown                                                              | -2.52                        | 0.279   | -7.09                   | 2.04    |
| Index of multiple deprivation (1 <sup>st</sup> quintile = reference) |                              |         |                         |         |
| 2 <sup>nd</sup> quintile                                             | 7.49                         | 0.026   | 0.92                    | 14.06   |
| 3 <sup>rd</sup> quintile                                             | -0.54                        | 0.883   | -7.70                   | 6.62    |
| 4 <sup>th</sup> quintile                                             | 5.38                         | 0.167   | -2.24                   | 13.01   |
| 5 <sup>th</sup> quintile (most deprived)                             | 7.92                         | 0.071   | -0.67                   | 16.51   |
| Unknown                                                              | -25.47                       | 0.011   | -45.10                  | -5.84   |
| Smoking status (Non-smoker = reference)                              |                              |         |                         |         |
| Current smoker                                                       | 26.40                        | 0.000   | 20.49                   | 32.31   |
| Ex-smoker                                                            | 15.00                        | 0.000   | 9.59                    | 20.42   |
| Unknown                                                              | 21.12                        | 0.000   | 13.23                   | 29.01   |
| Age group (0-14 years = reference)                                   |                              |         |                         |         |
| 15-24                                                                | 52.88                        | 0.000   | 42.16                   | 63.60   |
| 25-44                                                                | 72.19                        | 0.000   | 62.83                   | 81.55   |
| 45-64                                                                | 113.49                       | 0.000   | 103.97                  | 123.00  |
| 65-74                                                                | 73.96                        | 0.000   | 63.81                   | 84.10   |
| 75+                                                                  | 75.54                        | 0.000   | 65.43                   | 85.65   |
| Telephone consultation (Face-to-face = reference)                    | -279.51                      | 0.000   | -288.35                 | -270.66 |
| Practice list size (centred, per 1000)                               | -6.09                        | 0.065   | -12.56                  | 0.38    |
| Number of FTE GPs ( $\leq 2$ = reference)                            |                              |         |                         |         |
| >2 and $\leq 4$                                                      | -63.99                       | 0.045   | -126.58                 | -1.39   |
| >4 and $\leq 6$                                                      | -49.06                       | 0.150   | -115.82                 | 17.70   |
| >6 and $\leq 8$                                                      | -33.73                       | 0.442   | -119.68                 | 52.22   |
| >8 and $\leq 19$                                                     | -29.10                       | 0.596   | -136.61                 | 78.42   |
| Unknown                                                              | -106.02                      | 0.625   | -531.17                 | 319.12  |
| Number of FTE nurses ( $\leq 2$ = reference)                         |                              |         |                         |         |
| >2 and $\leq 4$                                                      | 20.31                        | 0.408   | -27.79                  | 68.41   |
| >4 and $\leq 6$                                                      | 49.99                        | 0.240   | -33.47                  | 133.46  |
| >6 and $\leq 8$                                                      | 113.35                       | 0.088   | -16.77                  | 243.48  |
| >8 and $\leq 19$                                                     | 137.25                       | 0.096   | -24.40                  | 298.89  |
| Unknown                                                              | -7.81                        | 0.791   | -65.58                  | 49.97   |
| Training practice (No = reference)                                   |                              |         |                         |         |
| Yes                                                                  | -11.09                       | 0.570   | -49.31                  | 27.14   |
| Unknown                                                              | -                            |         |                         |         |
| Nurse consultation rate, centred, per 1000 per 10,000 person years)  | -10.23                       | 0.000   | -12.84                  | -7.62   |
| GP consultation rate, centred, per 1000 per 10,000 person years)     | -0.49                        | 0.488   | -1.88                   | 0.90    |
| QOF performance (1 <sup>st</sup> quintile = reference)               |                              |         |                         |         |
| 2 <sup>nd</sup> quintile                                             | 28.82                        | 0.345   | -30.93                  | 88.56   |
| 3 <sup>rd</sup> quintile                                             | 6.08                         | 0.835   | -50.99                  | 63.14   |
| 4 <sup>th</sup> quintile                                             | 9.11                         | 0.738   | -44.24                  | 62.47   |
| 5 <sup>th</sup> quintile (best performance)                          | 31.22                        | 0.254   | -22.44                  | 84.89   |
| Unknown                                                              | -81.78                       | 0.575   | -367.98                 | 204.42  |
| Rural practice (Urban = reference)                                   | 13.93                        | 0.561   | -33.09                  | 60.96   |
| Mean duration                                                        | 543.41                       | 0.000   | 470.92                  | 615.90  |
